# Supplementary material for: Measurements of water content and D/H ratio in apatite and silicate glasses using a NanoSIMS 50L
Source: Royal Society of Chemistry journal article supplement (doi:10.1039/c4ja00417e), 2015-01-01
Supplement: c4ja00417e1.pdf [file c4ja00417e1.pdf]

## Tables S1-S2

Table S1. Secondary ion intensity ratios and cross check of water contents as unknown samples using the calibration curves of apatite and glass standards.

| Sample | Session* | Date     | D/H <sup>a</sup> | 2SD <sup>b</sup><br>(%) | <sup>1</sup> H/ <sup>18</sup> O <sup>a</sup> | 2SD <sup>b</sup><br>(%) | H <sub>2</sub> O <sup>c</sup><br>(ppm) | 2SD <sup>d</sup><br>(ppm) | Error <sup>e</sup><br>(%) |          |
|--------|----------|----------|------------------|-------------------------|----------------------------------------------|-------------------------|----------------------------------------|---------------------------|---------------------------|----------|
| MORB   | 1        | 20110406 | 1.73E-04         | 6                       | 0.220                                        | 10                      | 2798                                   | 280                       | 9                         |          |
|        | 1        | 20110407 | 1.64E-04         | 3                       | 0.212                                        | 7                       | 2697                                   | 189                       | 5                         |          |
|        | 1        | 20110408 | 1.74E-04         | 1                       | 0.229                                        | 9                       | 2913                                   | 262                       | 13                        |          |
|        | 1        | 20110409 | 1.73E-04         | 2                       | 0.221                                        | 11                      | 2811                                   | 309                       | 9                         |          |
|        | 1        | 20110410 | 1.67E-04         | 3                       | 0.207                                        | 2                       | 2633                                   | 53                        | 2                         |          |
|        | 1        | 20110411 | 1.77E-04         | 10                      | 0.229                                        | 11                      | 2913                                   | 320                       | 13                        |          |
|        | 1        | 20110412 | 1.60E-04         | 8                       | 0.236                                        | 7                       | 3002                                   | 210                       | 16                        |          |
|        | 1        | 20110413 | 1.76E-04         | 11                      | 0.208                                        | 12                      | 2646                                   | 317                       | 3                         |          |
|        |          |          | <i>Average</i>   | <i>1.71E-04</i>         | <i>7</i>                                     | <i>0.220</i>            | <i>10</i>                              | <i>2802</i>               | <i>271</i>                | <i>9</i> |
|        | 2        | 20111024 | 1.45E-04         | 3                       | 0.250                                        | 6                       | 3164                                   | 190                       | 23                        |          |
|        | 2        | 20111025 | 1.48E-04         | 5                       | 0.208                                        | 8                       | 2800                                   | 224                       | 9                         |          |
|        | 2        | 20111026 | 1.47E-04         | 2                       | 0.214                                        | 7                       | 2829                                   | 198                       | 10                        |          |
|        | 2        | 20111029 | 1.43E-04         | 1                       | 0.227                                        | 7                       | 2917                                   | 204                       | 13                        |          |
|        | 2        | 20111030 | 1.47E-04         | 7                       | 0.204                                        | 5                       | 2558                                   | 128                       | 1                         |          |
|        | 2        | 20111031 | 1.42E-04         | 2                       | 0.206                                        | 2                       | 2614                                   | 52                        | 1                         |          |
|        | 2        | 20111101 | 1.43E-04         | 2                       | 0.217                                        | 4                       | 2625                                   | 105                       | 2                         |          |
|        | 2        | 20111102 | 1.46E-04         | 7                       | 0.211                                        | 4                       | 2604                                   | 104                       | 1                         |          |
|        |          |          | <i>Average</i>   | <i>1.45E-04</i>         | <i>3</i>                                     | <i>0.217</i>            | <i>13</i>                              | <i>2764</i>               | <i>413</i>                | <i>7</i> |
|        | 3        | 20120419 | 1.71E-04         | 3                       | 0.180                                        | 12                      | 2444                                   | 293                       | 5                         |          |
|        | 3        | 20120420 | 1.78E-04         | 6                       | 0.172                                        | 13                      | 2486                                   | 323                       | 4                         |          |
|        | 3        | 20120423 | 1.74E-04         | 5                       | 0.207                                        | 9                       | 2928                                   | 264                       | 14                        |          |
|        | 3        | 20120424 | 1.64E-04         | 4                       | 0.197                                        | 0                       | 2918                                   | 9                         | 13                        |          |
|        | 3        | 20120425 | 1.64E-04         | 4                       | 0.210                                        | 1                       | 3067                                   | 31                        | 19                        |          |
|        | 3        | 20120426 | 1.72E-04         | 4                       | 0.176                                        | 8                       | 2584                                   | 207                       | 0                         |          |
|        | 3        | 20120427 | 1.68E-04         | 3                       | 0.232                                        | 1                       | 3147                                   | 31                        | 22                        |          |
|        | 3        | 20120428 | 1.76E-04         | 2                       | 0.201                                        | 15                      | 2832                                   | 425                       | 10                        |          |
|        |          |          | <i>Average</i>   | <i>1.71E-04</i>         | <i>6</i>                                     | <i>0.197</i>            | <i>20</i>                              | <i>2801</i>               | <i>532</i>                | <i>9</i> |
| 4      | 20121214 | 1.61E-04 | 4                | 0.225                   | 15                                           | 3198                    | 480                                    | 24                        |                           |          |
| 4      | 20121215 | 1.55E-04 | 4                | 0.170                   | 16                                           | 2280                    | 365                                    | 12                        |                           |          |
| 4      | 20121217 | 1.58E-04 | 4                | 0.150                   | 14                                           | 2105                    | 295                                    | 18                        |                           |          |

---

|     |                |                 |                 |              |              |             |             |            |           |
|-----|----------------|-----------------|-----------------|--------------|--------------|-------------|-------------|------------|-----------|
| 4   | 20121218       | 1.57E-04        | 4               | 0.189        | 11           | 2696        | 297         | 5          |           |
| 4   | 20121219       | 1.57E-04        | 4               | 0.244        | 17           | 3327        | 566         | 29         |           |
| 4   | 20121220       | 1.57E-04        | 3               | 0.240        | 15           | 3198        | 480         | 24         |           |
|     | <i>Average</i> | <i>1.58E-04</i> | <i>3</i>        | <i>0.203</i> | <i>38</i>    | <i>2801</i> | <i>1043</i> | <i>9</i>   |           |
| 5   | 20130827       | 1.53E-04        | 5               | 0.180        | 21           | 2503        | 531         | 3          |           |
| 5   | 20130828       | 1.58E-04        | 4               | 0.144        | 16           | 2010        | 312         | 22         |           |
| 5   | 20130829       | 1.55E-04        | 3               | 0.240        | 16           | 3337        | 521         | 29         |           |
| 5   | 20130830       | 1.52E-04        | 4               | 0.230        | 14           | 3198        | 459         | 24         |           |
| 5   | 20130831       | 1.55E-04        | 5               | 0.152        | 14           | 2116        | 296         | 18         |           |
| 5   | 20130901       | 1.54E-04        | 7               | 0.206        | 18           | 2872        | 517         | 11         |           |
| 5   | 20130903       | 1.53E-04        | 5               | 0.158        | 19           | 2204        | 419         | 15         |           |
| 5   | 20130904       | 1.51E-04        | 5               | 0.151        | 17           | 2110        | 359         | 18         |           |
| 5   | 20130905       | 1.49E-04        | 6               | 0.232        | 21           | 3226        | 662         | 25         |           |
| 5   | 20130906       | 1.53E-04        | 4               | 0.227        | 19           | 3163        | 594         | 23         |           |
| 5   | 20130907       | 1.51E-04        | 4               | 0.236        | 20           | 3291        | 668         | 28         |           |
| 5   | 20130908       | 1.51E-04        | 3               | 0.211        | 13           | 2940        | 375         | 14         |           |
| 5   | 20130909       | 1.51E-04        | 5               | 0.228        | 17           | 3182        | 534         | 23         |           |
| 5   | 20130910       | 1.51E-04        | 5               | 0.225        | 16           | 3135        | 509         | 22         |           |
| 5   | 20130912       | 1.51E-04        | 2               | 0.185        | 14           | 2580        | 365         | 0          |           |
| 5   | 20130913       | 1.54E-04        | 5               | 0.221        | 13           | 3083        | 395         | 20         |           |
| 5   | 20130914       | 1.55E-04        | 4               | 0.221        | 14           | 3082        | 431         | 20         |           |
| 5   | 20130915       | 1.54E-04        | 4               | 0.223        | 9            | 3111        | 274         | 21         |           |
| 5   | 20130916       | 1.57E-04        | 2               | 0.223        | 18           | 3108        | 562         | 21         |           |
| 5   | 20130920       | 1.52E-04        | 2               | 0.211        | 14           | 2937        | 397         | 14         |           |
| 5   | 20130923       | 1.55E-04        | 3               | 0.193        | 14           | 2692        | 364         | 4          |           |
|     | <i>Average</i> | <i>1.53E-04</i> | <i>3</i>        | <i>0.205</i> | <i>30</i>    | <i>2851</i> | <i>857</i>  | <i>11</i>  |           |
| 6   | 20140425       | 1.67E-04        | 5               | 0.192        | 14           | 2693        | 413         | 4          |           |
| 6   | 20140426       | 1.67E-04        | 6               | 0.183        | 17           | 2602        | 478         | 1          |           |
| 6   | 20140427       | 1.69E-04        | 2               | 0.178        | 19           | 2565        | 504         | 1          |           |
|     | <i>Average</i> | <i>1.68E-04</i> | <i>1</i>        | <i>0.184</i> | <i>8</i>     | <i>2620</i> | <i>131</i>  | <i>5</i>   |           |
| DAP | 1              | 20110408        | 1.82E-04        | 4            | 0.033        | 12          | 420         | 50         | 12        |
|     | 1              | 20110410        | 1.78E-04        | 8            | 0.042        | 12          | 534         | 64         | 12        |
|     | 1              | 20110412        | 1.92E-04        | 4            | 0.023        | 9           | 293         | 26         | 39        |
|     |                | <i>Average</i>  | <i>1.84E-04</i> | <i>8</i>     | <i>0.033</i> | <i>58</i>   | <i>416</i>  | <i>241</i> | <i>13</i> |

---

|   |                |                 |           |              |           |            |            |           |
|---|----------------|-----------------|-----------|--------------|-----------|------------|------------|-----------|
| 2 | 20111024       | 1.36E-04        | 4         | 0.057        | 11        | 721        | 79         | 51        |
| 2 | 20111025       | 1.37E-04        | 2         | 0.063        | 14        | 848        | 119        | 77        |
| 2 | 20111026       | 1.35E-04        | 4         | 0.056        | 13        | 740        | 96         | 55        |
| 2 | 20111029       | 1.30E-04        | 1         | 0.036        | 5         | 463        | 23         | 3         |
| 2 | 20111030       | 1.33E-04        | 6         | 0.037        | 8         | 464        | 37         | 3         |
| 2 | 20111031       | 1.33E-04        | 7         | 0.041        | 4         | 520        | 21         | 9         |
| 2 | 20111101       | 1.29E-04        | 3         | 0.045        | 14        | 544        | 76         | 14        |
| 2 | 20111102       | 1.29E-04        | 9         | 0.046        | 1         | 568        | 6          | 19        |
|   | <i>Average</i> | <i>1.33E-04</i> | <i>5</i>  | <i>0.048</i> | <i>43</i> | <i>609</i> | <i>286</i> | <i>27</i> |
| 3 | 20120419       | 1.85E-04        | 13        | 0.028        | 4         | 380        | 15         | 21        |
| 3 | 20120420       | 1.74E-04        | 5         | 0.032        | 3         | 462        | 14         | 3         |
| 3 | 20120423       | 1.78E-04        | 2         | 0.034        | 2         | 481        | 10         | 1         |
| 3 | 20120424       | 1.69E-04        | 10        | 0.035        | 0         | 518        | 2          | 8         |
| 3 | 20120425       | 1.85E-04        | 7         | 0.026        | 1         | 380        | 4          | 21        |
| 3 | 20120426       | 1.85E-04        | 1         | 0.028        | 1         | 411        | 4          | 14        |
| 3 | 20120427       | 1.95E-04        | 3         | 0.024        | 4         | 326        | 13         | 32        |
| 3 | 20120428       | 1.65E-04        | 2         | 0.031        | 1         | 437        | 4          | 9         |
|   | <i>Average</i> | <i>1.80E-04</i> | <i>11</i> | <i>0.030</i> | <i>26</i> | <i>424</i> | <i>125</i> | <i>11</i> |
| 4 | 20121214       | 1.69E-04        | 11        | 0.036        | 10        | 512        | 51         | 7         |
| 4 | 20121215       | 1.60E-04        | 4         | 0.037        | 5         | 496        | 25         | 4         |
| 4 | 20121217       | 1.71E-04        | 17        | 0.032        | 7         | 449        | 31         | 6         |
| 4 | 20121218       | 1.68E-04        | 10        | 0.036        | 6         | 514        | 31         | 7         |
| 4 | 20121219       | 1.65E-04        | 9         | 0.036        | 7         | 491        | 34         | 3         |
| 4 | 20121220       | 1.66E-04        | 10        | 0.036        | 6         | 480        | 29         | 0         |
|   | <i>Average</i> | <i>1.67E-04</i> | <i>5</i>  | <i>0.036</i> | <i>10</i> | <i>490</i> | <i>48</i>  | <i>3</i>  |
| 5 | 20130827       | 1.70E-04        | 9         | 0.022        | 15        | 313        | 47         | 35        |
| 5 | 20130828       | 1.66E-04        | 7         | 0.041        | 5         | 572        | 31         | 20        |
| 5 | 20130829       | 1.74E-04        | 11        | 0.039        | 8         | 548        | 44         | 15        |
| 5 | 20130830       | 1.72E-04        | 11        | 0.039        | 5         | 544        | 24         | 14        |
| 5 | 20130831       | 1.73E-04        | 8         | 0.025        | 0         | 344        | 1          | 28        |
| 5 | 20130903       | 1.58E-04        | 7         | 0.031        | 4         | 429        | 19         | 10        |
| 5 | 20130904       | 1.60E-04        | 16        | 0.023        | 18        | 321        | 58         | 33        |
| 5 | 20130905       | 1.67E-04        | 10        | 0.029        | 7         | 404        | 29         | 16        |
| 5 | 20130906       | 1.70E-04        | 11        | 0.029        | 8         | 397        | 30         | 17        |
| 5 | 20130907       | 1.71E-04        | 13        | 0.027        | 4         | 376        | 14         | 21        |
| 5 | 20130908       | 1.71E-04        | 16        | 0.026        | 5         | 356        | 19         | 26        |

---

|     |                |                 |                 |              |              |            |             |            |          |
|-----|----------------|-----------------|-----------------|--------------|--------------|------------|-------------|------------|----------|
| 5   | 20130909       | 1.65E-04        | 13              | 0.030        | 18           | 411        | 74          | 14         |          |
| 5   | 20130910       | 1.77E-04        | 8               | 0.029        | 20           | 404        | 82          | 16         |          |
| 5   | 20130912       | 1.67E-04        | 9               | 0.030        | 13           | 423        | 53          | 12         |          |
| 5   | 20130913       | 1.67E-04        | 10              | 0.029        | 8            | 403        | 32          | 16         |          |
| 5   | 20130913       | 1.65E-04        | 11              | 0.030        | 9            | 412        | 37          | 14         |          |
| 5   | 20130914       | 1.75E-04        | 7               | 0.029        | 12           | 404        | 47          | 15         |          |
| 5   | 20130915       | 1.76E-04        | 11              | 0.029        | 16           | 400        | 65          | 16         |          |
| 5   | 20130916       | 1.81E-04        | 5               | 0.029        | 5            | 399        | 20          | 17         |          |
| 5   | 20130920       | 1.50E-04        | 14              | 0.028        | 2            | 386        | 9           | 19         |          |
| 5   | 20130921       | 1.67E-04        | 7               | 0.029        | 15           | 408        | 61          | 15         |          |
| 5   | 20130923       | 1.71E-04        | 8               | 0.025        | 2            | 347        | 7           | 27         |          |
|     | <i>Average</i> | <i>1.69E-04</i> | <i>8</i>        | <i>0.029</i> | <i>33</i>    | <i>409</i> | <i>134</i>  | <i>14</i>  |          |
| 6   | 20140425       | 1.86E-04        | 6               | 0.032        | 4            | 449        | 20          | 6          |          |
| 6   | 20140426       | 1.71E-04        | 6               | 0.032        | 3            | 452        | 21          | 6          |          |
| 6   | 20140427       | 1.80E-04        | 17              | 0.029        | 18           | 414        | 77          | 14         |          |
|     | <i>Average</i> | <i>1.79E-04</i> | <i>9</i>        | <i>0.031</i> | <i>12</i>    | <i>438</i> | <i>42</i>   | <i>10</i>  |          |
| KOV | 2              | 20111024        | 1.52E-04        | 4            | 0.764        | 7          | 9669        | 677        | 1        |
|     | 2              | 20111025        | 1.51E-04        | 4            | 0.717        | 3          | 9652        | 290        | 2        |
|     | 2              | 20111026        | 1.49E-04        | 3            | 0.736        | 5          | 9730        | 486        | 1        |
|     | 2              | 20111029        | 1.50E-04        | 2            | 0.756        | 2          | 9714        | 194        | 1        |
|     | 2              | 20111030        | 1.46E-04        | 9            | 0.781        | 2          | 9793        | 196        | 0        |
|     | 2              | 20111031        | 1.47E-04        | 2            | 0.784        | 5          | 9948        | 497        | 2        |
|     | 2              | 20111101        | 1.50E-04        | 4            | 0.808        | 1          | 9776        | 98         | 0        |
|     | 2              | 20111102        | 1.50E-04        | 1            | 0.793        | 3          | 9788        | 294        | 0        |
|     |                | <i>Average</i>  | <i>1.49E-04</i> | <i>3</i>     | <i>0.767</i> | <i>8</i>   | <i>9759</i> | <i>186</i> | <i>0</i> |
|     | 3              | 20120419        | 1.69E-04        | 2            | 0.720        | 3          | 9777        | 293        | 0        |
|     | 3              | 20120420        | 1.74E-04        | 1            | 0.679        | 4          | 9813        | 393        | 0        |
|     | 3              | 20120423        | 1.78E-04        | 6            | 0.680        | 0          | 9620        | 38         | 2        |
|     | 3              | 20120424        | 1.76E-04        | 8            | 0.660        | 3          | 9775        | 293        | 0        |
|     | 3              | 20120425        | 1.73E-04        | 2            | 0.669        | 2          | 9770        | 195        | 0        |
|     | 3              | 20120426        | 1.73E-04        | 2            | 0.667        | 1          | 9794        | 98         | 0        |
|     | 3              | 20120427        | 1.71E-04        | 3            | 0.715        | 1          | 9698        | 97         | 1        |
|     | 3              | 20120428        | 1.74E-04        | 1            | 0.678        | 1          | 9551        | 96         | 3        |
|     |                | <i>Average</i>  | <i>1.74E-04</i> | <i>3</i>     | <i>0.684</i> | <i>7</i>   | <i>9725</i> | <i>188</i> | <i>1</i> |

---

|        |                |                 |          |              |          |             |            |          |    |
|--------|----------------|-----------------|----------|--------------|----------|-------------|------------|----------|----|
| 4      | 20121214       | 1.62E-04        | 3        | 0.679        | 3        | 9651        | 290        | 2        |    |
| 4      | 20121215       | 1.58E-04        | 3        | 0.726        | 4        | 9736        | 389        | 1        |    |
| 4      | 20121217       | 1.61E-04        | 3        | 0.717        | 2        | 10062       | 201        | 3        |    |
| 4      | 20121218       | 1.60E-04        | 2        | 0.688        | 6        | 9815        | 589        | 0        |    |
| 4      | 20121219       | 1.61E-04        | 2        | 0.694        | 7        | 9463        | 662        | 3        |    |
| 4      | 20121221       | 1.61E-04        | 2        | 0.686        | 4        | 9141        | 366        | 7        |    |
|        | <i>Average</i> | <i>1.61E-04</i> | <i>2</i> | <i>0.698</i> | <i>5</i> | <i>9645</i> | <i>631</i> | <i>2</i> |    |
| 5      | 20130827       | 1.57E-04        | 2        | 0.688        | 3        | 9582        | 279        | 2        |    |
| 5      | 20130828       | 1.61E-04        | 3        | 0.677        | 6        | 9439        | 566        | 4        |    |
| 5      | 20130829       | 1.61E-04        | 0        | 0.689        | 4        | 9604        | 341        | 2        |    |
| 5      | 20130829       | 1.60E-04        | 2        | 0.656        | 3        | 9140        | 236        | 7        |    |
| 5      | 20130830       | 1.59E-04        | 2        | 0.693        | 3        | 9661        | 290        | 1        |    |
| 5      | 20130831       | 1.57E-04        | 4        | 0.710        | 3        | 9899        | 293        | 1        |    |
| 5      | 20130905       | 1.61E-04        | 3        | 0.675        | 6        | 9414        | 600        | 4        |    |
| 5      | 20130906       | 1.57E-04        | 3        | 0.681        | 4        | 9493        | 365        | 3        |    |
| 5      | 20130907       | 1.59E-04        | 2        | 0.691        | 3        | 9627        | 267        | 2        |    |
| 5      | 20130908       | 1.59E-04        | 3        | 0.679        | 4        | 9467        | 356        | 3        |    |
| 5      | 20130909       | 1.56E-04        | 4        | 0.693        | 3        | 9660        | 249        | 1        |    |
| 5      | 20130910       | 1.61E-04        | 3        | 0.681        | 7        | 9485        | 692        | 3        |    |
| 5      | 20130911       | 1.59E-04        | 0        | 0.689        | 0        | 9606        | 39         | 2        |    |
| 5      | 20130912       | 1.59E-04        | 4        | 0.668        | 5        | 9306        | 499        | 5        |    |
| 5      | 20130913       | 1.62E-04        | 2        | 0.696        | 3        | 9705        | 247        | 1        |    |
| 5      | 20130914       | 1.60E-04        | 0        | 0.699        | 1        | 9747        | 81         | 1        |    |
| 5      | 20130915       | 1.61E-04        | 4        | 0.699        | 2        | 9744        | 145        | 1        |    |
| 5      | 20130916       | 1.60E-04        | 3        | 0.690        | 1        | 9619        | 59         | 2        |    |
| 5      | 20130921       | 1.61E-04        | 1        | 0.679        | 3        | 9457        | 318        | 4        |    |
| 5      | 20130923       | 1.60E-04        | 2        | 0.680        | 3        | 9473        | 297        | 3        |    |
|        | <i>Average</i> | <i>1.60E-04</i> | <i>2</i> | <i>0.686</i> | <i>4</i> | <i>9556</i> | <i>341</i> | <i>3</i> |    |
| 6      | 20140425       | 1.64E-04        | 4        | 0.695        | 5        | 9768        | 552        | 0        |    |
| 6      | 20140426       | 1.64E-04        | 3        | 0.688        | 2        | 9772        | 360        | 0        |    |
| 6      | 20140427       | 1.65E-04        | 1        | 0.680        | 3        | 9806        | 395        | 0        |    |
|        | <i>Average</i> | <i>1.64E-04</i> | <i>1</i> | <i>0.687</i> | <i>2</i> | <i>9782</i> | <i>42</i>  | <i>0</i> |    |
| 1833-1 | 5              | 20130827        | 1.56E-04 | 1            | 1.488    | 2           | 20737      | 377      | 15 |
|        | 5              | 20130829        | 1.57E-04 | 5            | 1.576    | 8           | 21967      | 1811     | 10 |
|        | 5              | 20130830        | 1.55E-04 | 4            | 1.601    | 3           | 22310      | 765      | 8  |

---

|          |   |                |                 |           |              |           |              |             |           |
|----------|---|----------------|-----------------|-----------|--------------|-----------|--------------|-------------|-----------|
|          | 5 | 20130901       | 1.53E-04        | 2         | 1.594        | 6         | 22217        | 1228        | 9         |
|          | 5 | 20130906       | 1.51E-04        | 2         | 1.543        | 8         | 21506        | 1634        | 12        |
|          | 5 | 20130907       | 1.52E-04        | 2         | 1.507        | 2         | 20998        | 499         | 14        |
|          | 5 | 20130908       | 1.55E-04        | 2         | 1.479        | 1         | 20606        | 243         | 15        |
|          | 5 | 20130913       | 1.58E-04        | 3         | 1.452        | 6         | 20240        | 1203        | 17        |
|          | 5 | 20130914       | 1.57E-04        | 3         | 1.517        | 2         | 21147        | 425         | 13        |
|          | 5 | 20130915       | 1.54E-04        | 2         | 1.620        | 3         | 22581        | 745         | 7         |
|          |   | <i>Average</i> | <i>1.54E-04</i> | <i>3</i>  | <i>1.539</i> | <i>8</i>  | <i>21451</i> | <i>1704</i> | <i>12</i> |
| 1833-11  | 5 | 20130828       | 1.56E-04        | 2         | 0.834        | 11        | 11617        | 1248        | 3         |
|          | 5 | 20130829       | 1.60E-04        | 2         | 0.874        | 1         | 12176        | 128         | 2         |
|          | 5 | 20130830       | 1.57E-04        | 3         | 0.911        | 4         | 12699        | 530         | 6         |
|          | 5 | 20130901       | 1.53E-04        | 5         | 0.923        | 6         | 12862        | 815         | 7         |
|          | 5 | 20130906       | 1.56E-04        | 3         | 0.836        | 7         | 11647        | 770         | 3         |
|          | 5 | 20130907       | 1.62E-04        | 6         | 0.883        | 8         | 12307        | 938         | 3         |
|          | 5 | 20130908       | 1.59E-04        | 3         | 0.910        | 1         | 12683        | 139         | 6         |
|          |   | <i>Average</i> | <i>1.58E-04</i> | <i>4</i>  | <i>0.881</i> | <i>8</i>  | <i>12284</i> | <i>1009</i> | <i>2</i>  |
| 519-4-1  | 5 | 20130828       | 1.44E-04        | 11        | 0.132        | 2         | 1833         | 92          | 8         |
|          | 5 | 20130829       | 1.62E-04        | 12        | 0.126        | 8         | 1760         | 136         | 4         |
|          | 5 | 20130830       | 1.63E-04        | 5         | 0.116        | 5         | 1622         | 134         | 5         |
|          | 5 | 20130906       | 1.40E-04        | 10        | 0.122        | 7         | 1704         | 114         | 0         |
|          | 5 | 20130907       | 1.49E-04        | 6         | 0.138        | 4         | 1919         | 141         | 13        |
|          | 5 | 20130908       | 1.51E-04        | 8         | 0.148        | 2         | 2063         | 104         | 21        |
|          | 5 | 20130913       | 1.40E-04        | 9         | 0.121        | 7         | 1682         | 109         | 1         |
|          | 5 | 20130923       | 1.58E-04        | 7         | 0.126        | 6         | 1758         | 100         | 3         |
|          |   | <i>Average</i> | <i>1.51E-04</i> | <i>12</i> | <i>0.129</i> | <i>16</i> | <i>1793</i>  | <i>16</i>   | <i>5</i>  |
| ND 70-01 | 5 | 20130829       | 1.60E-04        | 2         | 0.721        | 3         | 10046        | 264         | 1         |
|          | 5 | 20130830       | 1.59E-04        | 4         | 0.713        | 2         | 9930         | 178         | 1         |
|          | 5 | 20130901       | 1.61E-04        | 4         | 0.722        | 2         | 10058        | 224         | 1         |
|          | 5 | 20130907       | 1.53E-04        | 4         | 0.725        | 5         | 10105        | 521         | 1         |
|          | 5 | 20130913       | 1.62E-04        | 7         | 0.669        | 6         | 9319         | 562         | 7         |
|          | 5 | 20130914       | 1.61E-04        | 8         | 0.660        | 3         | 9204         | 287         | 8         |
|          | 5 | 20130915       | 1.61E-04        | 2         | 0.689        | 7         | 9600         | 681         | 4         |
|          |   | <i>Average</i> | <i>1.60E-04</i> | <i>4</i>  | <i>0.700</i> | <i>8</i>  | <i>9752</i>  | <i>751</i>  | <i>3</i>  |

---

---

\*Analytical sessions 1 and 2 were carried out in the combined mode, and the sessions 3, 4, 5 and 6 in the multi-collection mode;

<sup>a</sup>Average of the analyses carried out within single days;

<sup>b</sup>Standard deviation of the analyses carried out within single days;

<sup>c</sup>Water content corrected by calibration curves;

<sup>d</sup>Analytical error: including the counting errors of the samples and the analytical errors of the water content calibration curves;

<sup>e</sup>The difference between the measurements and the recommended values:  $([\text{H}_2\text{O}]_m - [\text{H}_2\text{O}]_r) / [\text{H}_2\text{O}]_r \times 100\%$ , where  $[\text{H}_2\text{O}]_m$  is the measured value and  $[\text{H}_2\text{O}]_r$  is the recommended value.

*Italic Average*: averages and standard deviations of all day analyses within the same analytical sessions.

Table S2. Secondary ion intensity ratios and cross check of water contents as unknown samples using the calibration curves of apatite and glass standards in element mode.

| Date     | Sample   | $^1\text{H}/^{18}\text{O}^{\text{a}}$ | 2SD <sup>b</sup><br>(%) | H <sub>2</sub> O <sup>c</sup><br>(ppm) | 2SD <sup>d</sup><br>(ppm) | Error <sup>e</sup><br>(%) |
|----------|----------|---------------------------------------|-------------------------|----------------------------------------|---------------------------|---------------------------|
| 20140504 | DAP      | 1.62E-01                              | 1.8                     | 440                                    | 11                        | 8.0                       |
| 20140504 | KOV      | 3.62E+00                              | 2.4                     | 9802                                   | 300                       | 0.0                       |
| 20140505 | DAP      | 1.52E-01                              | 7.0                     | 408                                    | 31                        | 14.7                      |
| 20140505 | KOV      | 3.65E+00                              | 3.3                     | 9805                                   | 383                       | 0.1                       |
| 20140506 | 519-4-1  | 1.84E-01                              | 4.2                     | 2162                                   | 118                       | 27.2                      |
| 20140506 | 1833-1   | 2.05E+00                              | 3.9                     | 24170                                  | 1230                      | 0.5                       |
| 20140506 | 1833-11  | 1.02E+00                              | 2.4                     | 12020                                  | 434                       | 0.2                       |
| 20140506 | MORB     | 1.90E-01                              | 32.4                    | 2235                                   | 753                       | 13.4                      |
| 20140506 | ND 70-01 | 8.86E-01                              | 2.2                     | 10437                                  | 360                       | 4.4                       |
| 20140507 | KOV      | 3.62E+00                              | 2.2                     | 9800                                   | 272                       | 0.0                       |
| 20140531 | 519-4-1  | 1.86E-01                              | 3.8                     | 2174                                   | 126                       | 27.9                      |
| 20140531 | 1833-1   | 2.05E+00                              | 2.1                     | 23943                                  | 992                       | 1.5                       |
| 20140531 | 1833-11  | 9.89E-01                              | 6.2                     | 11571                                  | 944                       | 3.6                       |
| 20140531 | KOV      | 3.59E+00                              | 1.5                     | 9720                                   | 197                       | 0.8                       |
| 20140531 | MORB     | 1.94E-01                              | 8.6                     | 2275                                   | 241                       | 11.8                      |
| 20140531 | ND7001   | 9.21E-01                              | 3.2                     | 10781                                  | 557                       | 7.8                       |
| 20140615 | 519-4-1  | 1.85E-01                              | 0.5                     | 2061                                   | 61                        | 21.3                      |
| 20140615 | 1833-1   | 2.13E+00                              | 1.4                     | 23738                                  | 900                       | 2.3                       |
| 20140615 | 1833-11  | 1.09E+00                              | 0.9                     | 12168                                  | 403                       | 1.4                       |
| 20140615 | ND 70-01 | 9.97E-01                              | 3.2                     | 11103                                  | 621                       | 11.0                      |
| 20140616 | DAP      | 1.62E-01                              | 5.0                     | 426                                    | 26                        | 10.9                      |
| 20140616 | KOV      | 3.68E+00                              | 2.6                     | 9659                                   | 373                       | 1.4                       |
| 20140616 | MORB     | 1.49E-01                              | 23.9                    | 1680                                   | 441                       | 34.9                      |
| 20140616 | ND 70-01 | 9.57E-01                              | 2.5                     | 10759                                  | 531                       | 7.6                       |

<sup>a</sup>Average of the analyses carried out within single days;



---

<sup>b</sup>Standard deviation of the analyses carried out within single days;

<sup>c</sup>Water content corrected by calibration curves;

<sup>d</sup>Analytical error: including the counting errors of the samples and the analytical errors of the water content calibration curves;

<sup>e</sup>The difference between the measurements and the recommended values:  $([\text{H}_2\text{O}]_m - [\text{H}_2\text{O}]_r) / [\text{H}_2\text{O}]_r \times 100\%$ , where  $[\text{H}_2\text{O}]_m$  is the measured value and  $[\text{H}_2\text{O}]_r$  is the recommended value.
